# Supplementary material for: Evaluation of antioxidant and neuroprotective activities of Cassia fistula (L.) using the Caenorhabditis elegans model
Source: PeerJ. 2018 Jul 13;6:e5159. doi: 10.7717/peerj.5159 (PMC6047507; doi:10.7717/peerj.5159)
Supplement: Data S1 [file peerj-06-5159-s001.xlsx]

## Sheet: Survival
N2
		Juglone treatment	EGCG 50µg-ml + Juglone	Solvent control + Juglone	CF 100µg-ml + Juglone	CF 200µg-ml + Juglone	CF 300µg-ml + Juglone
	1st	29.13	67.88	35.03	52.48	46.56	57.06
Survival %	2nd	24.29	43.92	31.37	29.67	33.33	53.9
	3rd	29.93	75.78	25.92	43.11	62	66.29
	4th	42.53	84	40.65	65.65	85.44	75.98
	5th	45.18	90.74	42.8	64.5	68.3	88.2
	6th	31.48	80	32.7	69.49	80.7	67.3

## Sheet: ROS
N2
			Mean Pixel Intensity
	Untreated control	EGCG 50µg-ml	Solvent control	CF 100µg-ml	CF 200µg-ml	CF 300µg-ml
1st	22273	3625.63	28471.4	10887.6	6514.23	5018.62
	30171.9	4079.05	25846.1	6879.73	12092	8617.14
	27631	8204.09	27545.5	8199.79	12611.6	8112.73
	25058.9	7238.53	26755.1	11246.9	5346.78	4823.54
	25666.7	3447.2	25479.2	9207.14	10308.7	3534.32
	24448.5	6382.28	31702.3	10589.6	12952.9	4552.43
	23971	7989.05	32150.9	6287.77	3819.66	6358.3
	29373.9	8009.98	29240	9440.35	10961.4	9315.39
	29258.2	6188.4	24309.9	8474.52	6649.55	9698.76
	22721.4	3765.41	22032.1	6775.7	9380.71	7297.12
	26722.4	3545.3	20448.3	7578.88	11036.9	7481.44
	23409.5	2474.15	36692.9	9119.92	8673.69	3903.99
	28571.1	6413.71	26334.8	21487.8	8798.43	8199.97
	32090.6	7587.32	29082.7	6330.18	8525.46	8555.1
	31528	5866.21	26459.3	15484.8	9431.56	4528.88
	30101.8	7557.9	26390	7436.14	13327.2	7945.22
	27344.2	3508.69	26635.1	6989.45	9338.71	8512.67
	29131	5505.64	27766.3	16514.2	7475.73	9793.95
	32206.3	4682.95	18741.1	10991.7	10596.4	7812.93
	28020.6	9026.35	24843.5	10170.3	12934.5	7859.04
	27017	5244.61	26942.7	9067.06	10250	5952.92
	27684.6	5533.57	29965.2	20000.7	3844.79	3536.3
	22779.6	4691.99	30581.4	7593.08	10549.8	8060.47
	27224.6	7295.58	20397.2	8861.26	9145.59	6541.09
	32284.8	8591.46	23763.5	13368.8	9841.67	3220.21
	30350.5	7673.5	28277.2	9699.55	10162.5	8751.1
	27491.7	8745.11	22304.7	10162	12016.2	9255.26
2nd	86.482	17.888	81.885	28.005	18.565	22.43
	88.94	15.123	70.535	17.373	28.128	18.795
	95.594	20.685	98.396	12.103	20.02	22.699
	95.913	16.094	64.554	13.357	33.798	16.778
	97.337	12.779	102.046	23.593	27.75	9.685
	96.883	9.984	98.5	26.635	14.156	11.122
	111.196	14.504	68.424	29.467	32.972	18.66
	84.967	15.411	67.272	8.788	18.415	11.032
	70.766	7.426	86.964	26.538	10.786	22.385
	86.773	7.371	72.205	16.412	21.214	22.055
	74.789	16.687	87.36	29.321	13.068	22.858
	73.916	10.829	106.246	26.176	12.97	17.988
	88.744	15.727	101.372	24.169	11.367	17.179
	89.651	16.959	110.356	27.9	28.657	16.34
	86.163	14.239	138.89	23.513	32.482	12.686
	103.67	8.128	94.834	8.835	31.125	20.843
	110.46	15.299	108.129	14.672	11.052	7.677
	126.535	20.394	90.803	23.873	37.003	20.535
	86.905	14.763	89.347	19.115	11.512	10.7
	95.301	7.669	100.001	13.421	8.716	8.898
	73.01	12.226	73.65	28.964	29.163	13.894
	76.724	17.929	93.556	11.556	23.814	21.524
	109.893	13.674	102.729	18.575	12.846	12.087
	84.654	12.597	94.58	15.486	10.154	7.005
	75.679	21.32	104.471	26.942	17.263	6.028
	102.145	7.82	104.183	27.638	10.558	13.072
	99.138	11.047	130.921	27.019	22.758	12.165
	85.667	12.065	68.832	25.589	11.623	13.601
	113.153	6.544	93.743	17.014	18.533	9.766
	93.991	10.819	80.052	21.981	18.744	17.128
					23.77
					32.342
					17.44
					22.895
					25.265
3rd	42907.9	12437.7	45110.3	21032.1	16863.3	10761.6
	53731.1	4541.25	44691	15646.9	9879.97	7107.38
	41967.1	9959.83	34626.5	17545.8	9536.13	4552.2
	48356.2	5490.37	45310.5	21867.6	15629.8	7611.72
	44054.6	7103.16	39118.7	18069.6	16764.7	7169.18
	43087	10038.1	41409.8	7460.52	14766.2	12926.6
	42366.1	6751.21	44464.7	6393.03	10812.4	13468.9
	40006.8	10932.1	40350.7	15284.1	17339.1	14268.8
	45851.3	10011.5	37526.3	7314.91	17504.4	8507.38
	42022.9	11529.6	41878.8	8728.94	15468	11584.5
	42628.4	8892.63	37003	16648.5	7256.85	3035.36
	45470.3	10984.3	44281.6	6302.57	11896.1	5623.51
	51306.9	7268.2	39123.4	6601.2	6204.24	14571.2
	47089.9	4334.1	40223.3	17314.7	17114.6	8205.05
	46671.1	4762.2	41167.4	20009.9	11102.4	6858.51
	49210.6	8677.97	44833.3	25881.8	17266.1	9714.03
	49467.6	10531.8	45612.4	19760.2	16459.5	6835.99
	43733.6	8711.94	37922.4	16898.8	14089.9	11355.9
	47595.8	4066.44	40594.8	5939.21	11134.2	4822.07
	43896.2	7411.37	39822.8	6114.42	19219	8940.55
	43203.9	5134.7	43933.1	14652.9	14387.1	11167.9
	39959	9284.51	35628	8089.56	10484.2	6066.45
	53605.6	5687.44	38636.5	8105.71	14971.5	13878.5
	40687.1	5350.1	45217.1	16861.4	10780.6	12238.1
	46159.7	8222.85	47832.2	21781.5	17744.2	15998.8
	43477.7	7016.69	42238.8	16068.4	15639.2	7908.66
	50129.9	10914.4	37858.3	19267.2	15192.6	15902.4
	42097.7	7439.57	39955.8	24714.5	5577.45	12438.4
	48063.1	9436.74	41787.8	20232.2	15633.2	9050.28
	48414.6	8109.05	40094.9	10392	13561.1	6831.95

## Sheet: DAF-16
TJ356
			Daf-16 %
1st		Cytoplasmic	Intermediate	Nuclear
	Untreated control	78	12	0
	EGCG 50µg/ml	9	12	69
	Solvent control	63	0	0
	CF 100µg-ml	42	12	36
	CF 200µg-ml	12	18	60
	CF 300µg-ml	0	14	60
2nd	Untreated Control	69	21	0
	EGCG 50µg/ml	0	0	90
	Solvent control	51	39	0
	CF 100µg-ml	0	39	54
	CF 200µg-ml	0	36	58
	CF 300µg-ml	6	21	63
3rd	Untreated Control	60	18	12
	EGCG 50µg/ml	0	6	84
	Solvent control	66	21	27
	CF 100µg-ml	27	36	27
	CF 200µg-ml	9	48	33
	CF 300µg-ml	12	24	66

## Sheet: SOD-3
CF1553
				Mean Pixel Intensity
		Untreated control	EGCG 100µg-ml	Solvent control	CF 100µg-ml	CF 200µg-ml	CF 300µg-ml
	1st	16017.8	33593	22479	22367.9	39094.1	30277.5
		21625.5	34573.9	22211.8	24156	31940.7	38119.6
		20532.6	38481.5	19948	27572.7	41057.2	35320.6
		20123.7	31421.6	20393.2	24152.2	37272	32212.4
		18295.1	33063.1	19415.5	27393.2	38857.4	32106.3
		20572	39207	20397.8	27804.5	38335.7	37340.2
		16061.8	31288.5	19841.8	23686	45517.8	39972.3
		22277.7	29931.7	23719.8	25009.9	35523.2	45081.4
		21146.5	34185.9	20427.5	22102.2	16477.7	38733.4
		17505	38885.7	21704.2	23656.7	39092.6	40667.2
		16161	41636.3	21717.1	24333.5	39492	38624.9
		20029.8	38629.1	20780.9	24580	36304.9	39271.6
		22215	36370.3	14636.8	21212.1	26080.1	38494
		18709.1	40438.6	19685.6	22740.9	20737.8	37551.2
		18060.2	43560.1	18110.5	25731.6	23224.4	19834.5
		13895.7	43845.3	17986.1	26666.1	21174.3	19677.6
		15896.7	38960	14246.2	29046.9	20615.8	25363.6
		21803.7	37258.5	19218.8	26330.2	19156.8	22070.7
		33264.2	37960.8	15001.9	22910.3	19807.2	27683.4
		33931.8	44677.8	23426	21540	21105	23071.7
	2nd	7632.05	33593	11183.6	22560.2	32732.5	38150.3
		9221.78	34573.9	11557.6	24801.4	33863.2	38687.9
		9711.8	38481.5	8865.87	28135.8	34712.8	38633.5
		5965.46	31421.6	4044.93	26116.3	38476.3	34805.3
		9475.29	33063.1	7840	27790.5	31690.7	41174.2
		10943.3	39207	4167.54	36659.5	33775.6	36412.9
		10155.3	31288.5	3780.06	24496	36587.8	32089.2
		7247.43	29931.7	8686.92	27714.2	35895.8	32324.7
		8246.11	34185.9	8783.94	23188.1	35537	38759.1
		5853.94	38885.7	5340.38	27224.4	37243.6	38390.2
		9733.25	41636.3	8922.19	29092.2	31465.2	39346.5
		6407.61	38629.1	6187.95	28047.5	33657.2	37754.9
		9170.65	36370.3	5071.92	13582.5	34354.2	32400.8
		7401.71	40438.6	10816	22769	37246.6	32574.9
		9213.21	43560.1	6151.47	17856.2	31347.6	41140.6
		3581.65	43845.3	13154.3	19146.8	36979.4	40323.6
		6307.74	38960	5646.57	20957.7	35181.4	37196.7
		6389.33	37258.5	5614.72	18556.5	31383.1	39218.9
		3222.21	37960.8	2756.58	13376.4	38006.9	38807
		3837.28	44677.8	4625.42	20359	32699.2	32491.7
		5822.37		3239.29	29938.7	31383.7	30933.9
		8455		9590.71	25552.8	33503.4	31172
		11090.6		6272.14	28910.6	34279.6	33662.5
	3rd	34895.1	35493.9	37245.7	37832.4	39094.1	30277.5
		24874.6	30118.3	37313.3	39883.9	31940.7	38119.6
		30085.1	55746.7	23160.4	46133.1	41057.2	35320.6
		12516.1	42461.3	23876	46216.3	44368.4	32212.4
		23592.6	46301.1	27104.3	43605.5	45956.8	32106.3
		31615.5	45413.5	23269.5	43380.4	37272	37340.2
		24050.7	41781.6	30424.3	37009.4	38857.4	39972.3
		32000.5	35190.6	39498.7	34173.6	38335.7	45081.4
		25773.3	31464.8	27567.3	24963.6	45517.8	38733.4
		28946.8	42245.3	18881.6	32629.6	35523.2	40667.2
		35686.8	38273	19684.2	29674.8	16477.7	38624.9
		31523	35841.8	29397.4	29345.1	39092.6	39271.6
		38739.9	43350.7	19383.6	33809.4	39492	38494
		36938.1	40110.2	21350.8	35796	36304.9	37551.2
		30633.3	56262.9	31946.3	31556	27276.1	39393.5
		16789.8	35268.4	28262.4	31612.3	34276	38806.4
		29963.2	39378.3	17502.8	34569.7	36167.6	35320.8
		25425.4	57687.6	27581.9	31881	40941.1	44250.6
		21600.9	43024.7	17452.1	33371.4	33784.9	36858.7
		27748	51268.8	21347.3	32867.8	37274.9	39593.6
		34573.1	49693.9	24209.9	39089.9	41277	43284.3
		41193.6	37745.3	30382.6	32339.6	27371.8	45239.1
		30595.8	53457.9	23415.9	29097.6	26793.6	39947.8
		35368.1	54441.3	25187.1	32301.9	33191.3	37370.6
		30743	39861.2	14889.8	35336.1	36532.7	49238.1
		31424.3	36028.3	15324.5	39405.2	33623.2	38102.3
		27831.9		29860.7	32066.3	33156.6	39580.3
		39697.5		37593.8	35585	35872.2	37726.8
		32524.8		31039.5	31467.5	26955	48740.5
		35703.1		33277.3	32875.9	34852.9	44786.8

## Sheet: GST-4
CL2166
				Mean Pixel Intensity
		Untreated control	EGCG 50µg/ml	Solvent control	CF100µg-ml	CF 200µg-ml	CF 300µg-ml
	1st	20784	6120.78	15175.6	19788.8	12357.4	7948.2
		14539.8	5516.59	19530.6	14321.4	6566	8484.57
		16415.7	9083.34	23910	12894.1	9560.24	7602.48
		20039.9	8225.23	20413.6	13878.5	9220.93	7317.13
		16556.4	7033.45	21659.6	14992.2	16074.1	5569.94
		21046.2	3506.49	14998.2	9387.8	10292.6	8741.1
		18038.2	3709.57	18535.9	12159.1	14506.6	7197.07
		18800.8	8297.01	14030.4	14484.1	12277.4	4702.83
		21899.1	6001.91	19007.4	11358	8996.99	4626.28
		21077.8	6338.42	20920.5	10165.1	18443.7	5147.18
		16265.2	6999.67	16898.1	9249.68	14771	5422.62
		21000.9	3434.23	11958.4	11946.4	14389.1	3615.7
		18746.9	6941.23	17659.4	12363.9	11790.3	6114.35
		16080.4	4102.29	18037.5	10789.5	14926.9	3566.61
		17917.5	4055.68	13400.9	12143.5	11828.6	4597.9
		14468.7	4276.06	21539.3	9493.97	14506.3	6876.55
		15926.2	4064.49	24572.2	10152.4	11597.3	5691.82
		14955.7	4492.5	18075.2	15100.3	14685.8	8988.16
		14555.3	7117.47	20814.9	19186.7	7539.28	5534.84
		26185.8	5742.08	21613.3	9711.73	4652.89	6584.2
		19237	5350.87	27093.3	14319	9777.08	11349.2
		21779.5	7187.53	30016.1	12167.3	15353.7	7921.32
		20002.7	5612.23	11857.6	10390.3	6477.51	3526.34
		15839.8	4785.59	15006.6	12027.3	9828.23	4200.64
		20063.5	6723.35	14999.8	10626.2	6423.68	5251.36
		18834.9	6782.06		13113.7	7260.29	8034.14
		23712.7	6184.76		9677.14	9680.86	5219.03
		18154.2	7324.56		10896.7	11008.3	11599.5
		31986.6	7168.12		11711.5	7785.89	8187.35
		18528.5	6184.67		10391	7881.93	9616.16
	2nd	15850.9	2759.02	11410.5	9955.65	12176.8	5557.73
		12130.9	7067.69	14571.9	10802.5	8476.74	6136.85
		12085.4	2752.9	12691.5	9560.7	10990.1	5163.52
		13292.8	7341.17	14335.1	9601.95	9121.36	7552.37
		12479.2	5729.18	11326.6	7726.59	14405.5	2978.42
		13409.7	4413.22	12026.8	13118.4	9874.97	2767.39
		14790.8	4406.53	11941.5	12919.5	8551.98	7623.71
		17083.9	4302.11	11442.8	13445.1	6443.06	3309.97
		13083.6	3227.11	11983.3	13557.9	5623.33	5640.67
		12427.6	4570.07	12427.5	6999.93	10730.8	6432.38
		15924.5	5041.99	12136.2	8558.71	11068.5	4311.08
		20964.5	6274.52	11072.5	20125.3	11414.5	5037.94
		17682.3	2738.59	17050.8	9612.27	9164.3	3843.43
		16034.4	6852.05	12885	12640.5	6037.85	4398.84
		14420.3	3847.61	11860.2	9103.9	10790.6	3728.99
		14475.5	5615.67	18517.3	7807.14	14865.1	3400.08
		15015	5210.49	15180.2	10853.8	4492.1	3930.65
		12783.1	3781.14	14871.5	14008.9	12921.9	5365.42
		15654.8	2601.42	15211.3	9507.64	12177.8	6341.47
		15861.2	3743.68	17475	12394	8480.37	8155.01
		12678.3	3146.04	13060.8	8532.59	8483.27	6883.56
		13017	5493.27	18927.3	5329.79	10263.5	5079.01
		14117.9	4050.77	16265.3	11693	12360	7113.69
		16635.1	3381.98	25507.4	7063.29	10536.4	6835.31
		14906.9	5893.58	14512.6	7722.55	11942.9	5844.44
		15229	4065.47	13632	8591.46	11718.7	7793.04
		15110.7	6449.92	14145.2	7491.84	13295.9	6346.37
		13919.9	3912.92	18371.1	9561.03	9066.29	6693.26
		13839.4	2502.9	17173.8	5037.98	13877.4	3327.62
		16456.7	5055.82	14048.5	11330.2	7817.15	5372.69
	3rd	44486.8	15519.5	52286.6	31682.8	26175.7	21796.2
		45255.7	20420.5	42556.6	28621.6	21705.5	25391.6
		40006.2	19181.2	41577.2	27175.1	21315.9	17142
		46565.4	20867.7	34516.4	36377.8	22695.9	23731.8
		33499.7	19347.8	43127.9	23812	25842.9	24493.6
		35211.9	17466.9	37629.7	28728.8	22478.6	25755.7
		41157.3	14948.7	32814	35228.1	23789.2	19940
		45293.9	18739.5	35182.1	21863.8	22867.7	21963.6
		46404.3	17451.3	37745.4	24118.5	21184.2	15487.2
		36668.8	10963.9	41115.1	24951.3	32424	17653.2
		38356.6	18744.5	34388.4	27251.3	28072.4	23114.1
		46824.5	12602.5	46662	30662.3	29246.8	17706.6
		35923.2	20048.2	42153.6	38366.6	22424.4	27331.1
		42997.7	13909.5	47320.8	32300.3	22812.6	18604.1
		32671.9	16007.8	35728.3	21545.5	26135.4	20052
		43747.3	14702.5	36903.6	33494.7	29458	16452.1
		34508.1	12747.7	39041.6	25869.3	26693.2	21416.5
		37877.9	27135.8	42573.8	35780.9	25977.9	19786.2
		45372.3	17974	44658.3	27147.2	19260.4	24974.7
		37331	15553.4	34572.2	16189.8	22508.9	21514.7
		42854.3	17662.2	37485.3	24118.6	13012.3	23916.7
		40687.6	15765.2	36246.6	26318.2	24371.7	19360.5
		46823.2	15400.2	35610.7	30888.7	28831.5	20387.4
		44011.6	14768	35577	27838.9	13675.8	23399.2
		39665.1	16514.3	39466.3	37317.1	18411.3	20578.1
		44395.1	18840.5	44434.7	21590.8	27681.3	19102.8
		48968.2	14926.1	29768.4	21622	29992.5	18369.4
		36928.2	12328.2		21628.4	27256.2	24228.5
		37613.2	8652.51		24523	32580.6	24742.8
		42312.1	15409.8		25802.7	29869.6	21691

## Sheet: PolyQ
AM141
				PolyQ40 aggregate number
	1st	Untreated control	EGCG 50µg-ml	Solvent control	CF 100µg-ml	CF 200µg-ml	CF 300µg-ml
		53	3	45	12	13	5
		56	5	47	10	13	15
		53	10	58	20	7	14
		54	12	45	13	21	9
		62	4	62	20	9	11
		57	11	62	9	4	14
		52	8	53	9	16	14
		66	10	46	16	11	9
		49	7	54	13	12	10
		50	8	55	14	13	7
		69	20	52	15	14	6
		52	19	46	8	7	13
		64	8	52	6	14	15
		48	11	51	14	15	8
		52	18	47	18	6	16
		67	7	66	7	19	4
		56	11	49	21	18	6
		55	19	50	13	20	8
		76	8	63	21	5	14
		46	8	59	16	21	10
		45	18	51	23	21	15
		53	7	49	23	21	7
		60	12	46	9	11	5
		55	9	54	9	7	9
		56	11	50	11	11	7
		48	9	45	10	21	13
		61	10	51	19	16	13
		51	13	55	13	5	15
		60	10	45	15	11	9
			17		20		10
					23		11
	2nd	55	19	30	11	7	8
		44	2	47	13	17	5
		41	11	39	9	6	11
		43	3	39	16	11	10
		39	10	44	6	7	11
		46	4	52	12	9	7
		43	14	50	7	18	3
		38	11	44	10	23	7
		41	20	36	16	20	3
		38	11	41	20	18	6
		53	6	47	7	18	9
		42	2	40	10	22	8
		37	10	47	17	16	8
		39	7	60	23	7	11
		37	9	52	23	14	16
		39	17	47	6	10	4
		35	7	43	25	22	9
		54	7	43	16	21	7
		50	9	45	18	17	12
		55	17	43	9	23	12
		44	11	49	14	15	9
		40	10	35	20	20	12
		35	10	34	20	4	14
		50	7	30	13	8	10
		47	12	45	18	8	14
		40	11	48	13	15	8
		41	3	42	15	9	9
		39	6		20	18	3
		68	13		15	3	12
						16
	3rd	30	9	33	13	5	11
		36	7	37	19	10	6
		41	8	29	19	17	14
		28	11	46	14	18	2
		46	7	35	17	2	10
		33	4	29	16	15	13
		43	10	49	18	16	10
		39	3	46	11	6	12
		36	6	36	17	17	12
		40	11	39	13	5	11
		50	10	34	4	3	9
		30	11	33	21	9	12
		33	9	32	22	2	9
		37	5	34	20	3	10
		28	8	41	12	7	12
		26	10	35	15	18	10
		30	7	44	14	17	7
		36	10	34	14	15	9
		37	7	38	16	12	10
		38	6	33	15	4	7
		38	9	40	4	17	8
		29	9	32	18	13	12
		29	3	45	14	8	7
		36	5	41	15	6	9
		27	2	39	16	11	13
		54	4	42	16	10	7
		28	6	42	12	8	6
		30	10	35	15	14	9
		31	5	40		11	9

## Sheet: Paralysis
							Paralysis assay
				PT50	Untreated control	EGCG 100µg/ml	Solvent control	CF 300µg/ml	CF 500µg/ml
					26	33	27	31	33
					27	33	27	31	31
					26	34	27	32	32
			2nd	Group	time	Status	Group	Time in hrs	Status	Group	time	Status	Group	time	status	Group	time	status
				Control	22	1	EGCG	22	1	MeOH	22	1	Cassia 300	22	1	Cassia 500	22	1
				Control	23	1	EGCG	23	1	MeOH	23	1	Cassia 300	23	1	Cassia 500	23	1
				Control	24	1	EGCG	24	1	MeOH	24	0	Cassia 300	24	1	Cassia 500	24	1
				Control	25	0	EGCG	25	1	MeOH	24	0	Cassia 300	25	1	Cassia 500	25	1
				Control	25	0	EGCG	26	1	MeOH	25	0	Cassia 300	26	0	Cassia 500	26	1
				Control	25	0	EGCG	27	0	MeOH	25	0	Cassia 300	27	0	Cassia 500	27	0
				Control	25	0	EGCG	27	0	MeOH	25	0	Cassia 300	27	0	Cassia 500	27	0
				Control	25	0	EGCG	27	0	MeOH	25	0	Cassia 300	27	0	Cassia 500	27	0
				Control	26	0	EGCG	27	0	MeOH	25	0	Cassia 300	27	0	Cassia 500	29	0
				Control	26	0	EGCG	27	0	MeOH	26	0	Cassia 300	29	0	Cassia 500	29	0
				Control	26	0	EGCG	29	0	MeOH	26	0	Cassia 300	29	0	Cassia 500	29	0
				Control	26	0	EGCG	29	0	MeOH	26	0	Cassia 300	29	0	Cassia 500	29	0
				Control	26	0	EGCG	29	0	MeOH	26	0	Cassia 300	29	0	Cassia 500	29	0
				Control	26	0	EGCG	29	0	MeOH	26	0	Cassia 300	29	0	Cassia 500	29	0
				Control	26	0	EGCG	29	0	MeOH	26	0	Cassia 300	29	0	Cassia 500	29	0
				Control	26	0	EGCG	29	0	MeOH	26	0	Cassia 300	32	0	Cassia 500	29	0
				Control	26	0	EGCG	29	0	MeOH	27	0	Cassia 300	32	0	Cassia 500	29	0
				Control	26	0	EGCG	29	0	MeOH	27	0	Cassia 300	32	0	Cassia 500	29	0
				Control	26	0	EGCG	29	0	MeOH	27	0	Cassia 300	32	0	Cassia 500	29	0
				Control	26	0	EGCG	29	0	MeOH	27	0	Cassia 300	32	0	Cassia 500	29	0
				Control	27	0	EGCG	29	0	MeOH	27	0	Cassia 300	32	0	Cassia 500	29	0
				Control	27	0	EGCG	29	0	MeOH	27	0	Cassia 300	32	0	Cassia 500	29	0
				Control	27	0	EGCG	32	0	MeOH	27	0	Cassia 300	32	0	Cassia 500	32	0
				Control	27	0	EGCG	32	0	MeOH	27	0	Cassia 300	32	0	Cassia 500	32	0
				Control	27	0	EGCG	32	0	MeOH	27	0	Cassia 300	32	0	Cassia 500	32	0
				Control	27	0	EGCG	32	0	MeOH	27	0	Cassia 300	32	0	Cassia 500	32	0
				Control	27	0	EGCG	32	0	MeOH	27	0	Cassia 300	32	0	Cassia 500	32	0
				Control	27	0	EGCG	32	0	MeOH	27	0	Cassia 300	32	0	Cassia 500	32	0
				Control	27	0	EGCG	32	0	MeOH	27	0	Cassia 300	32	0	Cassia 500	32	0
				Control	27	0	EGCG	32	0	MeOH	27	0	Cassia 300	32	0	Cassia 500	32	0
				Control	27	0	EGCG	32	0	MeOH	27	0	Cassia 300	32	0	Cassia 500	32	0
				Control	27	0	EGCG	32	0	MeOH	27	0	Cassia 300	32	0	Cassia 500	32	0
				Control	27	0	EGCG	32	0	MeOH	27	0	Cassia 300	32	0	Cassia 500	32	0
				Control	27	0	EGCG	32	0	MeOH	27	0	Cassia 300	32	0	Cassia 500	32	0
				Control	27	0	EGCG	32	0	MeOH	27	0	Cassia 300	32	0	Cassia 500	32	0
				Control	27	0	EGCG	32	0	MeOH	27	0	Cassia 300	32	0	Cassia 500	32	0
				Control	27	0	EGCG	32	0	MeOH	27	0	Cassia 300	32	0	Cassia 500	32	0
				Control	27	0	EGCG	32	0	MeOH	27	0	Cassia 300	32	0	Cassia 500	32	0
				Control	27	0	EGCG	32	0	MeOH	27	0	Cassia 300	32	0	Cassia 500	32	0
				Control	27	0	EGCG	32	0	MeOH	27	0	Cassia 300	32	0	Cassia 500	32	0
				Control	27	0	EGCG	32	0	MeOH	27	0	Cassia 300	34	0	Cassia 500	32	0
				Control	27	0	EGCG	32	0	MeOH	27	0	Cassia 300	34	0	Cassia 500	32	0
				Control	27	0	EGCG	34	0	MeOH	27	0	Cassia 300	34	0	Cassia 500	32	0
				Control	27	0	EGCG	34	0	MeOH	27	0	Cassia 300	34	0	Cassia 500	32	0
				Control	27	0	EGCG	34	0	MeOH	27	0	Cassia 300	34	0	Cassia 500	32	0
				Control	27	0	EGCG	34	0	MeOH	27	0	Cassia 300	34	0	Cassia 500	32	0
				Control	29	0	EGCG	34	0	MeOH	29	0	Cassia 300	34	0	Cassia 500	32	0
				Control	29	0	EGCG	34	0	MeOH	29	0	Cassia 300	34	0	Cassia 500	32	0
				Control	29	0	EGCG	34	0	MeOH	29	0	Cassia 300	34	0	Cassia 500	32	0
				Control	29	0	EGCG	34	0	MeOH	29	0	Cassia 300	34	0	Cassia 500	32	0
				Control	29	0	EGCG	34	0	MeOH	29	0	Cassia 300	34	0	Cassia 500	32	0
				Control	29	0	EGCG	34	0	MeOH	29	0	Cassia 300	34	0	Cassia 500	32	0
				Control	29	0	EGCG	34	0	MeOH	29	0	Cassia 300	34	0	Cassia 500	32	0
				Control	29	0	EGCG	34	0	MeOH	29	0	Cassia 300	34	0	Cassia 500	32	0
				Control	29	0	EGCG	34	0	MeOH	29	0	Cassia 300	34	0	Cassia 500	32	0
				Control	29	0	EGCG	34	0	MeOH	29	0	Cassia 300	34	0	Cassia 500	32	0
				Control	29	0	EGCG	34	0	MeOH	29	0				Cassia 500	32	0
				Control	32	0	EGCG	34	0	MeOH	29	0				Cassia 500	32	0
				Control	32	0	EGCG	34	0	MeOH	29	0				Cassia 500	32	0
							EGCG	34	0	MeOH	29	0				Cassia 500	32	0
							EGCG	34	0	MeOH	29	0				Cassia 500	32	0
							EGCG	34	0	MeOH	29	0				Cassia 500	32	0
							EGCG	34	0	MeOH	29	0				Cassia 500	32	0
							EGCG	34	0	MeOH	29	0				Cassia 500	32	0
							EGCG	34	0	MeOH	29	0				Cassia 500	32	0
							EGCG	34	0	MeOH	29	0				Cassia 500	32	0
							EGCG	34	0	MeOH	32	0				Cassia 500	32	0
							EGCG	34	0	MeOH	32	0				Cassia 500	32	0
							EGCG	34	0	MeOH	32	0				Cassia 500	32	0
							EGCG	34	0	MeOH	32	0				Cassia 500	32	0
							EGCG	34	0	MeOH	32	0				Cassia 500	32	0
							EGCG	34	0	MeOH	32	0				Cassia 500	32	0
							EGCG	34	0	MeOH	32	0				Cassia 500	32	0
							EGCG	34	0	MeOH	32	0				Cassia 500	32	0
							EGCG	34	0	MeOH	32	0				Cassia 500	32	0
							EGCG	34	0	MeOH	32	0				Cassia 500	32	0
							EGCG	34	0	MeOH	32	0				Cassia 500	32	0
							EGCG	34	0	MeOH	32	0				Cassia 500	32	0
							EGCG	34	0	MeOH	32	0				Cassia 500	32	0
							EGCG	34	0	MeOH	32	0				Cassia 500	32	0
							EGCG	34	0							Cassia 500	32	0
							EGCG	34	0							Cassia 500	32	0
							EGCG	34	0							Cassia 500	32	0
							EGCG	34	0							Cassia 500	32	0
							EGCG	34	0							Cassia 500	32	0
							EGCG	34	0							Cassia 500	32	0
							EGCG	34	0							Cassia 500	32	0
							EGCG	34	0							Cassia 500	32	0
							EGCG	34	0							Cassia 500	32	0
							EGCG	34	0							Cassia 500	32	0
							EGCG	34	0							Cassia 500	32	0
							EGCG	34	0							Cassia 500	32	0
							EGCG	34	0							Cassia 500	32	0
							EGCG	34	0							Cassia 500	32	0
							EGCG	34	0							Cassia 500	32	0
							EGCG	34	0							Cassia 500	32	0
							EGCG	34	0							Cassia 500	32	0
							EGCG	34	0							Cassia 500	32	0
							EGCG	34	0							Cassia 500	32	0
							EGCG	34	0							Cassia 500	32	0
							EGCG	34	0							Cassia 500	32	0
							EGCG	34	0							Cassia 500	32	0
							EGCG	34	0							Cassia 500	32	0
							EGCG	34	0							Cassia 500	32	0
							EGCG	34	0							Cassia 500	34	0
							EGCG	34	0							Cassia 500	34	0
							EGCG	34	0							Cassia 500	34	0
							EGCG	34	0							Cassia 500	34	0
							EGCG	34	0							Cassia 500	34	0
							EGCG	34	0							Cassia 500	34	0
							EGCG	34	0							Cassia 500	34	0
							EGCG	34	0							Cassia 500	34	0
							EGCG	34	0							Cassia 500	34	0
							EGCG	34	0							Cassia 500	34	0
							EGCG	34	0							Cassia 500	34	0
							EGCG	34	0							Cassia 500	34	0
							EGCG	34	0							Cassia 500	34	0
							EGCG	34	0							Cassia 500	34	0
							EGCG	34	0							Cassia 500	34	0
							EGCG	34	0							Cassia 500	34	0
							EGCG	34	0							Cassia 500	34	0
							EGCG	34	0							Cassia 500	34	0
							EGCG	34	0							Cassia 500	34	0
							EGCG	34	0							Cassia 500	34	0
							EGCG	34	0							Cassia 500	34	0
							EGCG	34	0							Cassia 500	34	0
							EGCG	34	0							Cassia 500	34	0
							EGCG	34	0							Cassia 500	34	0
							EGCG	34	0							Cassia 500	34	0
							EGCG	34	0							Cassia 500	34	0
							EGCG	34	0							Cassia 500	34	0
							EGCG	34	0							Cassia 500	34	0
							EGCG	34	0							Cassia 500	34	0
							EGCG	34	0							Cassia 500	34	0
							EGCG	34	0							Cassia 500	34	0
							EGCG	34	0							Cassia 500	34	0
							EGCG	34	0							Cassia 500	34	0
							EGCG	34	0							Cassia 500	34	0
							EGCG	34	0							Cassia 500	34	0
							EGCG	34	0							Cassia 500	34	0
							EGCG	34	0							Cassia 500	34	0
							EGCG	34	0							Cassia 500	34	0
							EGCG	34	0							Cassia 500	34	0
							EGCG	34	0							Cassia 500	34	1
							EGCG	34	0							Cassia 500	34	1
							EGCG	34	1							Cassia 500	34	1
							EGCG	34	1
			3rd	Group	Time in hrs	Status	Group	Time in hrs	Status	Group	time	Status	Group	time	status	Group	time	status
				Control	22	1	MeOH	22	1	EGCG 100	22	1	Cassia 300	22	1	Cassia 500	22	1
				Control	23	1	MeOH	23	1	EGCG 100	23	1	Cassia 300	23	1	Cassia 500	23	1
				Control	24	0	MeOH	24	0	EGCG 100	24	1	Cassia 300	24	1	Cassia 500	24	1
				Control	24	0	MeOH	24	0	EGCG 100	25	0	Cassia 300	25	1	Cassia 500	25	1
				Control	24	0	MeOH	24	0	EGCG 100	26	1	Cassia 300	26	1	Cassia 500	26	1
				Control	24	0	MeOH	24	0	EGCG 100	27	0	Cassia 300	27	1	Cassia 500	27	1
				Control	24	0	MeOH	24	0	EGCG 100	27	0	Cassia 300	29	0	Cassia 500	29	0
				Control	24	0	MeOH	25	0	EGCG 100	27	0	Cassia 300	29	0	Cassia 500	29	0
				Control	24	0	MeOH	25	0	EGCG 100	29	0	Cassia 300	29	0	Cassia 500	29	0
				Control	24	0	MeOH	25	0	EGCG 100	29	0	Cassia 300	29	0	Cassia 500	29	0
				Control	24	0	MeOH	25	0	EGCG 100	29	0	Cassia 300	29	0	Cassia 500	31	0
				Control	24	0	MeOH	25	0	EGCG 100	29	0	Cassia 300	29	0	Cassia 500	31	0
				Control	25	1	MeOH	26	0	EGCG 100	29	0	Cassia 300	29	0	Cassia 500	31	0
				Control	26	0	MeOH	26	0	EGCG 100	31	0	Cassia 300	29	0	Cassia 500	31	0
				Control	26	0	MeOH	26	0	EGCG 100	31	0	Cassia 300	29	0	Cassia 500	31	0
				Control	26	0	MeOH	26	0	EGCG 100	31	0	Cassia 300	29	0	Cassia 500	31	0
				Control	26	0	MeOH	26	0	EGCG 100	31	0	Cassia 300	29	0	Cassia 500	33	0
				Control	26	0	MeOH	26	0	EGCG 100	31	0	Cassia 300	29	0	Cassia 500	33	0
				Control	26	0	MeOH	27	0	EGCG 100	31	0	Cassia 300	31	0	Cassia 500	33	0
				Control	26	0	MeOH	27	0	EGCG 100	31	0	Cassia 300	31	0	Cassia 500	33	0
				Control	26	0	MeOH	27	0	EGCG 100	31	0	Cassia 300	31	0	Cassia 500	33	0
				Control	26	0	MeOH	27	0	EGCG 100	31	0	Cassia 300	31	0	Cassia 500	33	0
				Control	26	0	MeOH	27	0	EGCG 100	33	0	Cassia 300	31	0	Cassia 500	33	0
				Control	27	0	MeOH	27	0	EGCG 100	33	0	Cassia 300	31	0	Cassia 500	33	0
				Control	27	0	MeOH	27	0	EGCG 100	33	0	Cassia 300	31	0	Cassia 500	33	0
				Control	27	0	MeOH	27	0	EGCG 100	33	0	Cassia 300	31	0	Cassia 500	33	0
				Control	27	0	MeOH	27	0	EGCG 100	33	0	Cassia 300	31	0	Cassia 500	33	0
				Control	27	0	MeOH	27	0	EGCG 100	33	0	Cassia 300	31	0	Cassia 500	33	0
				Control	27	0	MeOH	27	0	EGCG 100	33	0	Cassia 300	31	0	Cassia 500	33	0
				Control	27	0	MeOH	27	0	EGCG 100	33	0	Cassia 300	31	0	Cassia 500	33	0
				Control	27	0	MeOH	29	0	EGCG 100	33	0	Cassia 300	31	0	Cassia 500	33	0
				Control	27	0	MeOH	29	0	EGCG 100	33	0	Cassia 300	31	0	Cassia 500	33	0
				Control	27	0	MeOH	29	0	EGCG 100	33	0	Cassia 300	31	0	Cassia 500	34	0
				Control	27	0	MeOH	29	0	EGCG 100	33	0	Cassia 300	31	0	Cassia 500	34	0
				Control	27	0	MeOH	29	0	EGCG 100	33	0	Cassia 300	31	0	Cassia 500	34	0
				Control	27	0	MeOH	29	0	EGCG 100	33	0	Cassia 300	31	0	Cassia 500	34	0
				Control	27	0	MeOH	31	0	EGCG 100	33	0	Cassia 300	31	0	Cassia 500	34	0
				Control	27	0	MeOH	31	0	EGCG 100	33	0	Cassia 300	31	0	Cassia 500	34	0
				Control	29	0	MeOH	31	0	EGCG 100	33	0	Cassia 300	31	0	Cassia 500	34	1
				Control	29	0	MeOH	31	0	EGCG 100	33	0	Cassia 300	31	0	Cassia 500	34	1
				Control	29	0	MeOH	33	0	EGCG 100	33	0	Cassia 300	31	0	Cassia 500	34	1
				Control	29	0	MeOH	33	0	EGCG 100	33	0	Cassia 300	31	0	Cassia 500	34	1
				Control	29	0	MeOH	34	0	EGCG 100	33	0	Cassia 300	31	0	Cassia 500	34	1
				Control	31	0	MeOH	34	0	EGCG 100	33	0	Cassia 300	31	0
				Control	31	0				EGCG 100	33	0	Cassia 300	31	0
				Control	31	0				EGCG 100	33	0	Cassia 300	31	0
				Control	31	0				EGCG 100	33	0	Cassia 300	31	0
										EGCG 100	34	0	Cassia 300	31	0
										EGCG 100	34	0	Cassia 300	31	0
										EGCG 100	34	0	Cassia 300	31	0
										EGCG 100	34	0	Cassia 300	31	0
										EGCG 100	34	0	Cassia 300	31	0
										EGCG 100	34	1	Cassia 300	31	0
										EGCG 100	34	1	Cassia 300	31	0
													Cassia 300	31	0
													Cassia 300	33	0
													Cassia 300	33	0
													Cassia 300	33	0
													Cassia 300	33	0
													Cassia 300	33	0
													Cassia 300	33	0
													Cassia 300	33	0
													Cassia 300	33	0
													Cassia 300	33	0
													Cassia 300	33	0
													Cassia 300	33	0
													Cassia 300	33	0
													Cassia 300	33	0
													Cassia 300	33	0
													Cassia 300	33	0
													Cassia 300	33	0
													Cassia 300	33	0
													Cassia 300	33	0
													Cassia 300	33	0
													Cassia 300	33	0
													Cassia 300	33	0
													Cassia 300	33	0
													Cassia 300	33	0
													Cassia 300	33	0
													Cassia 300	34	0
													Cassia 300	34	0
													Cassia 300	34	0
													Cassia 300	34	0
													Cassia 300	34	0
													Cassia 300	34	0
													Cassia 300	34	1
													Cassia 300	34	1
													Cassia 300	34	1
													Cassia 300	34	1

## Sheet: HSP
TJ375
	Mean Pixel intensity							Converted into percentage
	Juglone treatment	EGCG 50 µg/ml + Juglone	Solvent control + Juglone	CF 100 µg/ml + Juglone	CF 200 µg/ml + Juglone	CF 300 µg/ml + Juglone
	27242.9	26803.6	25437.4	11279.7	14422.6	24310.5		213.873	210.424	265.586	117.769	150.583
	8978.35	11252.2	6141.56	4830.39	21766	26101.5		70.4854	88.3368	64.1226	50.433	227.254
	7342.89	3411.57	7995.82	13833.2	26219.8	22421.4		57.6461	26.7829	83.4825	144.429	273.755
	14201.4	4575.89	6310.82	9270.01	10024.7	22073.3		111.49	35.9234	65.8898	96.786	104.666
	11979.2	4938.8	20778.4	12806.5	14324.3	9931.99		94.0442	38.7725	216.943	133.71	149.556
	8934.44	6377.26	7034.02	11684	22709.8	12973.8		70.1407	50.0653	73.4405	121.99	237.108
	9915.43	23819.5	5218.6	12302.8	10406.5	7926.84		77.842	186.997	54.4862	128.45	108.651
	7735.82	15650	11559.8	5191.59	9801.02	9004.54		60.7308	122.862	120.693	54.2042	102.33
	7100.45	3768.67	8126.3	4023.91	14997.5	12269.9		55.7428	29.5863	84.8448	42.0127	156.585
	5024.11	5351.56	3799.88	4019.91	13886.5	9803.42		39.4422	42.013	39.6736	41.971	144.985
	9775.01	3100.71	2425	6054.77	23521.7	8301.02		76.7397	24.3424	25.3189	63.2165	245.584
	9256.88	2889.7	2312.07	9174.74	9451.04	17447.1		72.672	22.6858	24.1398	95.7912	98.6761
	10557.4	17464.6	5718.15	21265.3	21166.3	21995		82.8818	137.108	59.7019	222.026	220.992
	12572.5	2976.17	8024.3	7416.19	12315.1	8937.88		98.7017	23.3647	83.7798	77.4307	128.579
	8229.95	2659.99	26293.3	9526.61	10817.6	10123.8		64.61	20.8825	274.522	99.4651	112.944
	9862.03	5048.24	6451.15	5334.37	26246.7	22397.9		77.4228	39.6317	67.355	55.6949	274.035
	25678.1	2964.12	18963.9	20607.4	21755.3	9674.49		201.588	23.2701	197.998	215.157	227.142
	24399.9	3939.44	7185.61	17418.5	10516.9	8377.71		191.554	30.9269	75.0232	181.863	109.805
	21115.6	14944.6	6806.34	16245.6	12898	14022.7		165.77	117.324	71.0633	169.616	134.665
	12555.5	10730.1	15616.8	24614.7	10782.2	22195		98.5682	84.2375	163.051	256.996	112.575
	10019	3290.88	19077.5	19430.1	24832.9	10319.1		78.6549	25.8354	199.184	202.865	259.275
	9457.1	3807.66	7638.14	6892.57	12464.2	11429.9		74.2438	29.8924	79.748	71.9637	130.136
	9446.5	3393.22	8150.98	4610.3	29963.8	12995.2		74.1606	26.6388	85.1025	48.135	312.845
	16735.1	4029.9	5326.63	17196.2	19569	8145.32		131.38	31.6371	55.614	179.542	204.315
	12691.4	4553.69	5876.79	7741.85	13141.4	6557.97		99.6352	35.7492	61.3582	80.8308	137.206
	8794.12	3107.76	10147.9	10960.8	11540.1	9373.61		69.0391	24.3977	105.952	114.44	120.488
	24321.9	14730.1	4679.27	6008.38	11689.2	8596.21		190.942	115.64	48.8552	62.7321	122.044
	12737.9	20380.9	11587.9	6484.44	19899.8	24678.2			160.002	120.986	67.7025	207.769
		10779.6	5536.16	6909.18	15479.1	16238.7			84.6263	57.8017	72.1371	161.614
			7114.82	14548.4	10853.1	14617.5				74.2842	151.896	113.315
			9577.84		21878.7	23283.4						228.43
					16738	9866.91						174.757
					15332.3							160.081
					9123.72							95.2586
					11008.4							114.936
	10460.4	4147.34	13759.1	5717.78	6702.79	15280.3		71.5011	28.3488	181.191	75.2966	88.2681
	13031	2382.85	7945.39	3023.48	3606.45	13650.3		89.072	16.2878	104.632	39.8158	47.4928
	23426.1	3816.43	4954.81	3851.35	1604.99	15654		160.127	26.0869	65.2492	50.7179	21.1359
	23650.2	877.04	3827.55	3259.34	3989.06	9362.26		161.659	5.99493	50.4044	42.9217	52.5314
	13679.2	6395.51	20071.3	1617.85	1814.81	9436.07		93.5028	43.716	264.316	21.3053	23.899
	16908.6	2221.23	5083.01	4816.16	10533	9334.92		115.577	15.183	66.9374	63.4233	138.708
	13745.9	2895.22	5489.16	4173.3	1869.44	13239.2		93.959	19.79	72.2859	54.9576	24.6184
	5762.33		7509.75	1712.78	3489.33	16140.7		39.3879		98.8949	22.5554	45.9504
	19049.7		11256.3	3131.33	1483.49	11115.4		130.212		148.232	41.236	19.5359
	17298.2		4407.87	2128.46	6353.85	12265.1		118.241		58.0467	28.0293	83.673
	9509.62		2871.67	2345.99	4047.96	11818.8		65.0022		37.8166	30.894	53.307
	7398.8		4110.41	5059.3	9514.78	10349.2		50.5738		54.1295	66.6252	125.299
	13079		3183.35	6613	15378.8	11538.9		89.4005		41.9211	87.0856	202.521
	17334.8		3022.28	1290.95	7447.11	10051		118.491		39.8	17.0003	98.0699
	7901.72		2833.9	3703.77	2487.61	15498		54.0115		37.3192	48.7744	32.759
	16584.8		1817.35	2936.43	2138.87	11843.3		113.364		23.9325	38.6694	28.1665
	14145.1		10297.1	1325.24	1976.8	13655.1		96.6874		135.601	17.4518	26.0322
	4420.4		7596.11	7284.93	6064.74	10759.6		30.2152		100.032	95.9342	79.8657
	9552.3		9778.9	3612.59	10475.9	13737.5		65.2939		128.777	47.5737	137.956
	15506.2		14478.4	3009.25	7201.4	9810.46		105.991		190.664	39.6284	94.8343
	20659.6		12901.6	4973.57	1905.01	13064.9		141.217		169.899	65.4963	25.0868
	17982.1		11124	2687.18	955.316	9875.42		122.915		146.491	35.3872	12.5804
	17985.4		3112.54	2151.09	4942.14	11477.5		122.937		40.9886	28.3273	65.0823
	16986.4		13762.4	2531.32	13075.1	8850.06		116.109		181.235	33.3346	172.184
	19684.5		5703.03	1920.08	13662	10135.2		134.552		75.1024	25.2852	179.912
	14629.7		6538.26	10136.5	5553.07					86.1014	133.486	73.1276
			7593.67	1751.22	5219.06						23.0616	68.729
				797.348	8671.58						10.5002	114.195
				4888.68	6350.58						64.3783	83.6299
				2294.7	17050.3						30.2185	224.534
	12165.4	9607.96	1618.8	8033.3	10487.4	13293.3		185.335	146.374	23.9179	118.693	154.953
	14626.6	1075.66	11282.1	2340.79	1895.29	10233.9		222.83	16.3872	166.694	34.5854	28.0031
	3964.17	3051.3	11238.7	2284.88	1129.22	13312.5		60.3926	46.4853	166.052	33.7593	16.6843
	6242.87	4826.64	2263.39	2789.97	2058.48	11969.4		95.1076	73.532	33.4418	41.222	30.4142
	13579.3	2619.89	2405.03	1337.63	3111.39	9399.72		206.875	39.913	35.5345	19.7636	45.971
	4221.83	1088.88	8214.86	1656.22	2573.65	12271.6		64.318	16.5887	121.375	24.4707	38.0259
	7117.6	637.137	9281.3	1521.85	2750.83	12669.3		108.434	9.70653	137.132	22.4854	40.6437
	11957.4	424.515	5169.37	1275.44	4500.45	10209		182.166	6.46732	76.3779	18.8447	66.4945
	12710.6	10312.4	11444.2	3139.59	7571.65	13873.7		193.641	157.105	169.088	46.3876	111.872
	2205.87	2572.15	2192.68	1548.77	4380.72	13493.7		33.6055	39.1857	32.397	22.8832	64.7254
	3194.37	1791.77	6282.93	4289.07	4265.59	15195		48.6649	27.2969	92.8308	63.3714	63.0245
	2122.63	2221.07	1134.68	1186.72	1266.63	16120.4		32.3375	33.8371	16.765	17.5339	18.7146
	7096.36	4332.34	2001.9	5807.24	7021.92	10534.6		108.11	66.0015	29.5783	85.8025	103.749
	3728.81	1912.76	6644.42	1125.55	12559.7	5999.16		56.8069	29.1402	98.1719	16.6301	185.57
	1725.83	2643.67	15987.8	1389.94	5554.46	6185.09		26.2923	40.2752	236.22	20.5364	82.0676
	1801.74	3048.42	7194.64	5086.73	4689.37	6262.06		27.4488	46.4415	106.301	75.1568	69.2858
	2497.59	13614.8	1419.38	4982.67	4943.43	13411.1		38.0498	207.416	20.9715	73.6194	73.0396
	2369.34	14396.3	1931.87	1274.46	3358.59	15355.7		36.096	219.322	28.5435	18.8303	49.6235
	2511.97	714.296	11509	2347.09	4274.61	6216.52		38.2689	10.882	170.046	34.6785	63.1578
	2562.04	1458.3	1689.77	2030.03	4994.37	10972.5		39.0317	22.2166	24.9664	29.9939	73.7922
	1894.21		5040.85	1307.14	6542.48	12855.8		28.8575		74.4791	19.3131	96.6657
	2241.02		1912.15	1183.97	4247.54	10767		34.141		28.2522	17.4932	62.7577
	15370.5		1626.88	4802.32	6743.35	11207.3		234.164		24.0372	70.9546	99.6335
	16067.9		8018.59	2711.36	8113.6	12729.6		244.788		118.475	40.0606	119.879
	4618.35		12280.1	1196.47	3717.86	12259.6		70.3588		181.44	17.6779	54.9316
	1631.56		12294.5	1453.71	779.69	12992.7		24.8562		181.652	21.4787	11.52
	10376.4		13730.5	1683.98	1149.44	11199.4		158.08		202.869	24.881	16.983
	13056.3		5672.74	1568.71	664.045	13201.7		198.907		83.8152	23.1778	9.81132
	2599.16		14264.9	1871.98	1436.51	5133.55		39.5972		210.764	27.6587	21.2246
	10662.5		7296.73	1804.6	1272.67	11253.3		162.439		107.81	26.663	18.8039
	6564		6768.15
	24217.1	9159.57						112.728	42.6367
	6475.36	17972.5						30.142	83.6596
	18872.1	3014.12						87.8472	14.0304
	24328.8	5602.79						113.248	26.0803
	33686.6	25849.1						156.807	120.324
	4627.72	10390.8						21.5415	48.3679
	38552.9	5834.36						179.459	27.1582
	27387.8	3643.37						127.487	16.9594
	36023.1	4688.72						167.683	21.8254
	37330.7	2535.44						173.77	11.8022
	34751.9	9873.04						161.766	45.9578
	7551.07	4691.79						35.1493	21.8397
	31543.5	5114.65						146.831	23.8081
	27793.4	3490.03						129.375	16.2457
	29534.3	2501.27						137.479	11.6431
	10498	5001.1						48.8671	23.2795
	8576.06	3472.65						39.9205	16.1648
	30723.1	3400.91						143.012	15.8308
	19262.6	3300.29						89.665	15.3625
	11400.7	26345.5						53.0691	122.635
	10292.6	2764.51						47.9109	12.8685
	16886.9	18577.4						78.6067	86.4754
	11500	4536.34						53.5311	21.1161
	13771.6	4302.06						64.105	20.0256
	21482.8	22552							104.977
		8235.07							38.3332

## Sheet: DPPH
DPPH
		EGCG	mg/ml		ug/ml
		EC50	0.001506	1st	1.506
		EC50	0.001388	2nd	1.388
		EC50	0.001448	3rd	1.448	STDEV
					1.44733	0.0590028
		Vita C
		EC50	0.002764	1st	2.764
		EC50	0.002587	2nd	2.587
		EC50	0.002724	3rd	2.724	STDEV
					2.69167	0.0928242
		CF
		EC50	0.05347	1st	53.47
		EC50	0.05263	2nd	52.63
		EC50	0.05175	3rd	51.75	STDEV
					52.6167	0.860078

## Sheet: Folin
Folin
1st
Cassia mg/ml	Cassia		Blank	Cassia - Blank		Interp. X	Folin value mg/mg
0.125	0.6256	0.6725	0.0481	0.5775	0.6244	0.0117278	0.0938227
0.0625	0.3961	0.4173	0.0473	0.3488	0.37	0.00641714	0.102674	0.0982485
Cassia mg/ml	Cassia		Blank	Cassia - Blank		Interp. X	Folin value mg/mg
0.125	0.6496	0.6027	0.0486	0.601	0.5541	0.0112134	0.089707
0.0625	0.3892	0.3868	0.0464	0.3428	0.3404	0.00602579	0.0964126	0.0930598
Cassia mg/ml	Cassia		Blank	Cassia - Blank		Interp. X	Folin value
0.125	0.5978	0.5546	0.0479	0.5499	0.5067	0.0101306	0.0810445
0.0625	0.3892	0.402	0.0463	0.3429	0.3557	0.00619508	0.0991213	0.0900829
								Final value in ug	STDEV
								98.2485
								93.0598
								90.0829
								93.797	4.13241

[truncated: 1 more sheets: CUPRAC]
